# Supplementary material for: Stratified analyses reveal temporal instability and seasonal modulation of lateralized lying in domestic cats
Source: Research Square preprint supplement (doi:10.21203/rs.3.rs-8540763/v1), 2026-01-14
Supplement: Supplementary file 1 [file 089f9cb00e3d7bdb047e11c4.xlsx]

## Sheet: 工作表1
Group	N (cats)	Pooled LI
All low-frequency individuals	95	0.0552
Males	48	0.0667
Females	42	0.0732
