# Supplementary material for: Stratified analyses reveal temporal instability and seasonal modulation of lateralized lying in domestic cats
Source: Research Square preprint supplement (doi:10.21203/rs.3.rs-8540763/v1), 2026-01-14
Supplement: Supplementary file 2 [file 14c0d51bbf1d5eb1ea653b81.xlsx]

## Sheet: 工作表1
Cat_ID	Total_observations	LI
Duoduo	10	-0.6
Xixi	11	-0.4545
Xiaobudian	10	-0.4
Wuhuarou	25	-0.2
Youzi	9	-0.1111
Jiujiu	46	-0.087
Nini	32	-0.0625
Lele	43	-0.0233
Rocky	43	-0.0233
Tiaotiao	34	0
Dami	43	0.0233
Mimishanmai	29	0.0345
Mose	42	0.0476
Oulian	44	0.0909
Lulumi	33	0.0909
Bilu	50	0.12
Lucy	23	0.1304
Heitang/Lu	42	0.1429
Miso	35	0.1429
Abu	25	0.2
Neko	64	0.2188
Zhuanzhuan	37	0.2432
Doudou	46	0.2609
Huanyan	25	0.28
Dugu	29	0.3103
Lumi	42	0.3333
Mochi	24	0.3333
Erer	19	0.3684
Banban	24	0.4167
Huangmi-T	16	0.625
