# Supplementary material for: Stratified analyses reveal temporal instability and seasonal modulation of lateralized lying in domestic cats
Source: Research Square preprint supplement (doi:10.21203/rs.3.rs-8540763/v1), 2026-01-14
Supplement: Supplementary file 3 [file 912d04078e7f0ffa032711ee.xlsx]

## Sheet: 工作表1
Solar_term_index	Anan_LI	Achao_LI	Jumi_LI	Omi_LI
1	-0.1467	NA	NA	NA
2	NA	NA	NA	NA
3	-1	NA	0.0667	-0.0455
4	NA	NA	NA	NA
5	0	-0.5714	NA	NA
6	0.25	0.1304	0	0
7	0	-0.1429	0.1875	0.0588
8	0.1	-0.0556	-0.1667	-0.0588
9	0.3214	-0.3333	0.2143	0.2667
10	0.0556	0.25	-0.0625	0.0833
11	0.1111	0.4375	0.2	-0.1333
12	0	0.3125	0.0526	0.1579
13	NA	0.1111	0.25	0.1176
